# Supplementary material for: Detection of Cell Carcinogenic Transformation by a Quadruplex DNA Binding Fluorescent Probe
Source: PubMed Central journal article supplement (PMC3904876; doi:10.1371/journal.pone.0086143), 2014-01-28

### Figure S3

Increased expression of BMVC in  $\gamma$ -ray treated cells. Cultured cells were treated with 0, 0.5, 1, 1.5, 2 Gy  $\gamma$ -ray for (a)0 and (b)1 day.

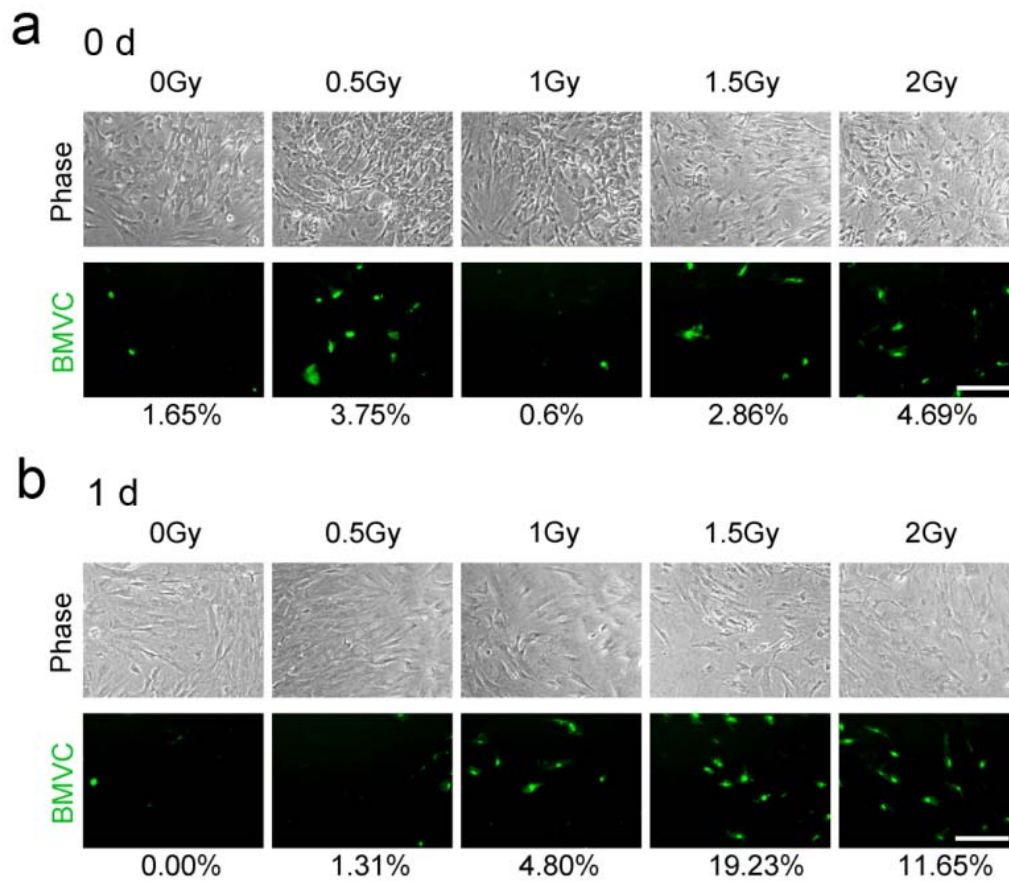

Supplement: pone.0086143.s003.pdf [file pone.0086143.s003.pdf]
